# Supplementary material for: The Societal Influences and Quality of Life Among Healthcare Team Members During the COVID-19 Pandemic
Source: PubMed Central journal article supplement (PMC8542799; doi:10.3389/fpsyt.2021.706443), 2021-10-11
Supplement: Table_1.pdf [file Table_1.pdf]

**Supplementary Table S1** Measures used in our study

| Measures                                                                                                                                                                    | Items                                                                                                                                                            | Response scale                                                                                       |
|-----------------------------------------------------------------------------------------------------------------------------------------------------------------------------|------------------------------------------------------------------------------------------------------------------------------------------------------------------|------------------------------------------------------------------------------------------------------|
| Depression (DRPST <sup>1</sup> ): In recent one month, do you have the following symptoms persisted more than two weeks?                                                    | Item 1: Depressed mood most of the day, nearly every day.                                                                                                        | 0 = no, 1 = yes                                                                                      |
|                                                                                                                                                                             | Item 2: Fatigue or loss of energy nearly every day.                                                                                                              | 0 = no, 1 = yes                                                                                      |
|                                                                                                                                                                             | Item 3: Feeling of worthlessness or excessive or inappropriate guilt nearly every day                                                                            | 0 = no, 1 = yes                                                                                      |
| <i>Post-traumatic stress disorder, PTSD, PTSD symptoms severity (DRPST<sup>1</sup>):</i> In recent one month, do you have the following symptoms during the past one month? | Item 1: Unhappy or lack of interest in most time                                                                                                                 | 1=no distress, 2=little distress, 3=moderate distress, 4=significant distress, 5= extremely distress |
|                                                                                                                                                                             | Item 2: It was still very difficult to relax or feel insecure without watching/thinking about COVID-19 news/events                                               | 1=no distress, 2=little distress, 3=moderate distress, 4=significant distress, 5= extremely distress |
|                                                                                                                                                                             | Item 3: The body had reactions (such as palpitations, tremors, muscle tightness, sweating...) when you exposed to news/events of COVID-19 or similar situations. | 1=no distress, 2=little distress, 3=moderate distress, 4=significant distress, 5= extremely distress |
|                                                                                                                                                                             | Item 4: Avoiding places, activities, people or reports that remind you of the COVID-19 news/events.                                                              | 1=no distress, 2=little distress, 3=moderate distress, 4=significant distress, 5= extremely distress |
|                                                                                                                                                                             | Item 5: Trying to avoid thinking about the COVID-19 news/events.                                                                                                 | 1=no distress, 2=little distress, 3=moderate distress, 4=significant distress, 5= extremely distress |
|                                                                                                                                                                             | Item 6: Often re-experience the image or                                                                                                                         | 1=no distress, 2=little distress,                                                                    |

|                                                                                                                                                                              |                                                                                                                                                                 |                                                                                                       |
|------------------------------------------------------------------------------------------------------------------------------------------------------------------------------|-----------------------------------------------------------------------------------------------------------------------------------------------------------------|-------------------------------------------------------------------------------------------------------|
|                                                                                                                                                                              | situation of the traumatic event, as if it happened again, and feel suffering                                                                                   | 3=moderate distress, 4= significant distress, 5= extremely distress                                   |
|                                                                                                                                                                              | Item 7:Repeated nightmare about topics related to COVID-19 news/events                                                                                          | 1=no distress, 2=little distress, 3=moderate distress, 4= significant distress, 5= extremely distress |
|                                                                                                                                                                              | Item 8:Do you feel pessimistic and uncertain about the future                                                                                                   | 1=no distress, 2=little distress, 3=moderate distress, 4= significant distress, 5= extremely distress |
| <i>Post-traumatic stress disorder, PTSD, PTSD symptoms frequency (DRPST<sup>1</sup>): In recent one month, do you have the following symptoms during the past one month?</i> | Item 1:Unhappy or loss of interest in most time                                                                                                                 | 1=never, 2=only one time, 3=two to three times, 4=four to six times, 5=every day                      |
|                                                                                                                                                                              | Item 2:It was still very difficult to relax or feel insecure without watching/thinking about COVID-19 news/events                                               | 1=never, 2=only one time, 3=two to three times, 4=four to six times, 5=every day                      |
|                                                                                                                                                                              | Item 3:The body had reactions (such as palpitations, tremors, muscle tightness, sweating...) when you exposed to news/events of COVID-19 or similar situations. | 1=never, 2=only one time, 3=two to three times, 4=four to six times, 5=every day                      |
|                                                                                                                                                                              | Item 4:Avoiding places, activities, people or reports that remind you of the COVID-19 news/events.                                                              | 1=never, 2=only one time, 3=two to three times, 4=four to six times, 5=every day                      |
|                                                                                                                                                                              | Item 5:Trying to avoid thinking about the COVID-19 news/events.                                                                                                 | 1=never, 2=only one time, 3=two to three times, 4=four to six times, 5=every day                      |
|                                                                                                                                                                              | Item 6:Often re-experience the image or situation of the traumatic event, as if it                                                                              | 1=never, 2=only one time, 3=two to three times, 4=four to six times,                                  |

|                                                                      |                                                                                                    |                                                                                                                     |
|----------------------------------------------------------------------|----------------------------------------------------------------------------------------------------|---------------------------------------------------------------------------------------------------------------------|
|                                                                      | happened again, and feel suffering                                                                 | 5=every day                                                                                                         |
|                                                                      | Item 7: Repeated nightmare about topics related to COVID-19 news/events                            | 1=never, 2=only one time, 3=two to three times, 4=four to six times, 5=every day                                    |
|                                                                      | Item 8: Do you feel pessimistic and uncertain about the future                                     | 1=never, 2=only one time, 3=two to three times, 4=four to six times, 5=every day                                    |
| Sleep (PSQI <sup>2</sup> ): During the past month,....               | Item 1: Do you cannot get to sleep within 30 minutes?                                              | 1 = not during the past month, 2 = less than once a week, 3 = once or twice a week, 4 = three or more times a week. |
|                                                                      | Item 2: Do you wake up in the middle night or early morning, and you cannot sleep again?           | 1 = not during the past month, 2 = less than once a week, 3 = once or twice a week, 4 = three or more times a week. |
|                                                                      | Item 3: How would you rate your sleep quality overall?                                             | 1 = very good, 2 = fairly good, 3 = fairly bad, 4 = very bad.                                                       |
|                                                                      | Item 4: How much of a problem has it been for you to keep up enough enthusiasm to get things done? | 1 = not a problem at all, 2 = only a very slight problem, 3 = somewhat of a problem, 4 = a very big problem.        |
| Social distance (SISQ <sup>4</sup> ): How has COVID-19 impacted you? | Item 1: I avoid communication with or encountering strangers.                                      | 1 = never (0%), 2 = Rarely (10%), 3 = sometimes (30%), 4 = often (60% or above)                                     |
|                                                                      | Item 2: I avoid close or personal contact with family members and/or people I am close to.         | 1 = never (0%), 2 = Rarely (10%), 3 = sometimes (30%), 4 = often (60% or above)                                     |
|                                                                      | Item 3: I avoid going out, especially if I should require public transport                         | 1 = never (0%), 2 = Rarely (10%), 3 = sometimes (30%), 4 = often                                                    |

|                                      |                                                |                                                                                       |
|--------------------------------------|------------------------------------------------|---------------------------------------------------------------------------------------|
|                                      |                                                | (60% or above)                                                                        |
|                                      | Item 4: I reduce eating out.                   | 1 = never (0%), 2 = Rarely (10%),<br>3 = sometimes (30%), 4 = often<br>(60% or above) |
| Social anxiety (SISQ <sup>4</sup> ): | Item 1: I worry about the pandemic affecting   | 1 = never (0%), 2 = Rarely (10%),                                                     |
| How has COVID-19                     | my work.                                       | 3 = sometimes (30%), 4 = often                                                        |
| impacted you?                        |                                                | (60% or above)                                                                        |
|                                      | Item 2: I feel anxious or fearful due to the   | 1 = never (0%), 2 = Rarely (10%),                                                     |
|                                      | pandemic.                                      | 3 = sometimes (30%), 4 = often                                                        |
|                                      |                                                | (60% or above)                                                                        |
| Social information (SISQ             | Item 1: I constantly check for latest pandemic | 1 = never (0%), 2 = Rarely (10%),                                                     |
| <sup>4</sup> ): How has COVID-19     | news updates via television, computer or       | 3 = sometimes (30%), 4 = often                                                        |
| impacted you?                        | phone                                          | (60% or above)                                                                        |
|                                      | Item 2: I continuously seek out information    | 1 = never (0%), 2 = Rarely (10%),                                                     |
|                                      | regarding COVID-19.                            | 3 = sometimes (30%), 4 = often                                                        |
|                                      |                                                | (60% or above)                                                                        |
| Social adaptation (SISQ              | Item 1:I am more cautious of residents from    | 1 = never (0%), 2 = Rarely (10%),                                                     |
| <sup>4</sup> ): How has COVID-19     | severely impacted areas                        | 3 = sometimes (30%), 4 = often                                                        |
| impacted you?                        |                                                | (60% or above)                                                                        |
|                                      | Item 2:I avoid or cancel traveling overseas    | 1 = never (0%), 2 = Rarely (10%),                                                     |
|                                      | (Answer "60%", if you have cancelled an        | 3 = sometimes (30%), 4 = often                                                        |
|                                      | overseas trip. Answer "10%" or "30%", if you   | (60% or above)                                                                        |
|                                      | are still considering your cancellation.)      |                                                                                       |

<sup>1</sup>: DRPST=Disaster-Related Psychological Screening Test

<sup>2</sup>: PSQI=Pittsburgh Sleep Quality Index

<sup>3</sup>: SF-12v2=The 12-item Short Form Survey version 2

<sup>4</sup>: SISQ=Societal Influences Survey Questionnaires

**Supplementary Table S2** Distribution of marital status

| Marital status | n   | %    |
|----------------|-----|------|
| Single         | 330 | 48.3 |
| Married        | 309 | 45.2 |
| Divorced       | 33  | 4.8  |
| Widowed        | 6   | 0.9  |
| Cohabited      | 2   | 0.3  |
| Remarried      | 0   | 0    |
| Others         | 3   | 0.4  |

**Supplementary Table S3** Distribution of chronic illness within 1 year

| Chronic illness         | n  | %   |
|-------------------------|----|-----|
| Hypertension            | 37 | 5.4 |
| Dyslipidemia            | 20 | 2.9 |
| Diabetes mellitus       | 20 | 2.9 |
| Coronary artery disease | 9  | 1.3 |
| Hepato-biliary disease  | 8  | 1.2 |
| Gastric disease         | 20 | 2.9 |
| Lung disease            | 3  | 0.4 |
| Cancer                  | 6  | 0.9 |
| Others                  | 36 | 5.3 |

**Supplementary Table S4.** Multiple linear regression for possible related factors of Total SISQ score with 1000 bootstrapping samples

| Variable             | Beta  | 95% CI      |             | P Value |
|----------------------|-------|-------------|-------------|---------|
|                      |       | Lower Bound | Upper Bound |         |
| Female               | 2.063 | 0.982       | 3.139       | 0.001   |
| Married              | 0.961 | 0.023       | 1.887       | 0.045   |
| Regular intake       | 1.721 | 0.575       | 2.884       | 0.006   |
| PTSD frequency score | 0.516 | 0.410       | 0.609       | 0.001   |
| Age                  | 0.066 | 0.017       | 0.111       | 0.005   |
| Education years      | 0.254 | 0.048       | 0.445       | 0.005   |

Dependent Variable: Total score SISQ

**Supplementary Table S5.** Multiple linear regression for possible related factors of PCS value of SF-12 with 1000 bootstrapping samples

| Variable                      | Beta   | 95% CI      |             | P Value            |
|-------------------------------|--------|-------------|-------------|--------------------|
|                               |        | Lower Bound | Upper Bound |                    |
| Chronic illness within 1 year | -2.381 | -3.509      | -1.158      | 0.001              |
| Smoking                       | -1.833 | -3.866      | 0.136       | 0.062 <sup>a</sup> |
| Exercises habits              | 1.730  | 0.843       | 2.628       | 0.001              |
| Sleep score                   | -0.514 | -0.713      | -0.316      | 0.001              |
| MCS Value                     | -0.092 | -0.151      | -0.031      | 0.004              |
| PTSD frequency score          | -0.306 | -0.478      | -0.142      | 0.001              |
| Social Distance               | -0.185 | -0.307      | -0.056      | 0.009              |

Dependent Variable: PCS value of SF-12,

<sup>a</sup>: excluded from bootstrapping methods



**Supplementary Table S6.** Multiple linear regression for possible related factors of MCS value of SF-12 with 1000 bootstrapping samples

| Variable                         | Beta   | 95% CI      |             | P Value |
|----------------------------------|--------|-------------|-------------|---------|
|                                  |        | Lower Bound | Upper Bound |         |
| Age                              | 0.132  | 0.070       | 0.188       | 0.001   |
| Participate in social activities | 1.652  | 0.276       | 3.063       | 0.001   |
| PTSD frequency score             | -0.663 | -0.846      | -0.462      | 0.021   |
| Sleep score                      | -0.749 | -1.044      | -0.459      | 0.001   |
| Social Anxiety                   | -1.092 | -1.540      | -0.666      | 0.001   |
| Social Information               | 0.619  | 0.190       | 1.025       | 0.001   |
| Depression score                 | -2.804 | -3.740      | -1.791      | 0.003   |
| PCS Value                        | -0.152 | -0.267      | -0.041      | 0.001   |

Dependent Variable: MCS value of SF-12

**Supplementary Table S7.** Multiple linear regression for possible related factors of Social Distance

| Variable             | Beta  | t     | 95% CI      |             | P Value |
|----------------------|-------|-------|-------------|-------------|---------|
|                      |       |       | Lower Bound | Upper Bound |         |
| Age                  | 0.185 | 5.047 | 0.033       | 0.074       | <0.001  |
| PTSD frequency score | 0.163 | 4.479 | 0.074       | 0.190       | <0.001  |
| Female               | 0.154 | 4.212 | 0.577       | 1.583       | <0.001  |
| Regular intake       | 0.127 | 3.453 | 0.425       | 1.546       | 0.001   |

Dependent Variable: Social Distance

**Supplementary Table S8.** Multiple linear regression for possible related factors of Social Anxiety

| Variable             | Beta   | t      | 95% CI      |             | P Value |
|----------------------|--------|--------|-------------|-------------|---------|
|                      |        |        | Lower Bound | Upper Bound |         |
| PTSD frequency score | 0.396  | 10.000 | 0.141       | 0.210       | <0.001  |
| MCS Value            | -0.180 | -4.433 | -0.046      | -0.018      | <0.001  |
| Had religion         | 0.102  | 3.030  | 0.125       | 0.584       | 0.003   |
| Nursing staff        | 0.086  | 2.534  | 0.066       | 0.519       | 0.011   |
| Sleep score          | -0.080 | -2.032 | -0.098      | -0.002      | 0.042   |

Dependent Variable: Social Anxiety

**Supplementary Table S9.** Multiple linear regression for possible related factors of Social Information

| Variable             | Beta  | t     | 95% CI      |             | P Value |
|----------------------|-------|-------|-------------|-------------|---------|
|                      |       |       | Lower Bound | Upper Bound |         |
| PTSD frequency score | 0.276 | 7.654 | 0.087       | 0.147       | <0.001  |
| Age                  | 0.127 | 3.375 | 0.008       | 0.030       | 0.001   |
| Had religion         | 0.113 | 3.020 | 0.131       | 0.618       | 0.003   |
| Regular intake       | 0.089 | 2.436 | 0.070       | 0.651       | 0.015   |

Dependent Variable: Social Information

**Supplementary Table S10.** Multiple linear regression for possible related factors of Social Adaptation

| Variable             | Beta  | t     | 95% CI      |             | P Value |
|----------------------|-------|-------|-------------|-------------|---------|
|                      |       |       | Lower Bound | Upper Bound |         |
| Education years      | 0.156 | 4.213 | 0.063       | 0.172       | <0.001  |
| PTSD frequency score | 0.144 | 3.885 | 0.036       | 0.109       | <0.001  |
| Female               | 0.137 | 3.701 | 0.283       | 0.922       | <0.001  |
| Regular intake       | 0.080 | 2.144 | 0.032       | 0.737       | 0.032   |

Dependent Variable: Social Adaptation

**Supplementary Table S11.** The ANOVA test for the difference of total SISQ among healthcare team

members with different depression score.

| Depression score | Number | Total SISQ (Mean±SD) | F     | P value |
|------------------|--------|----------------------|-------|---------|
| 0                | 552    | 26.58±6.242          | 1.685 | 0.169   |
| 1                | 68     | 27.65±5.296          |       |         |
| 2                | 29     | 28.55±7.424          |       |         |
| 3                | 34     | 27.76±6.155          |       |         |
